# Supplementary material
Source: Springer Nature journal article supplement (https://www.springermedizin.de/resource/supplementary/13256_2011_2095_MOESM1_ESM.pdf/9649080)

(a)

11:16:22.4

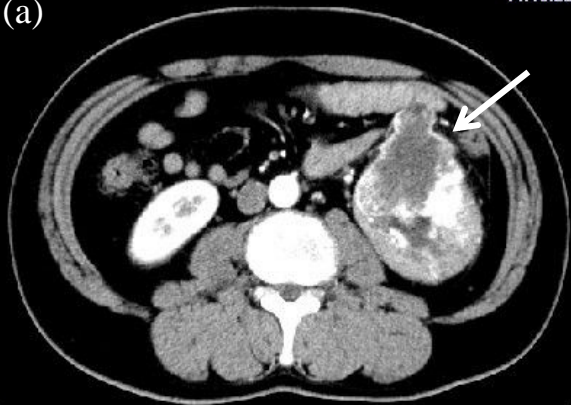

(b)

2009-1  
11:16:22.43

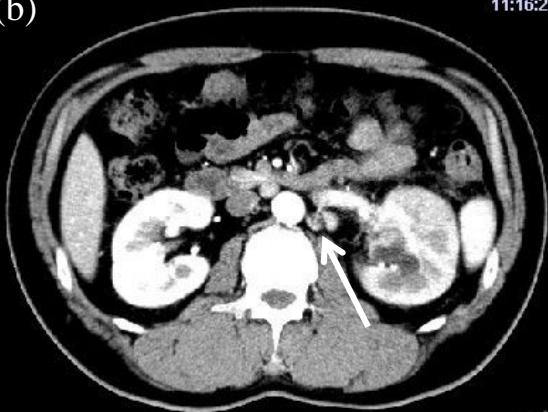

ED

D

ic 32sOmnipaque300 132cc/30sec

Supplement: MOESM1 [file 9649080]
